# Supplementary material for: The Phytotoxicity of Meta-Tyrosine Is Associated With Altered Phenylalanine Metabolism and Misincorporation of This Non-Proteinogenic Phe-Analog to the Plant's Proteome
Source: PubMed Central journal article supplement (PMC7069529; doi:10.3389/fpls.2020.00140), 2020-03-06
Supplement: DataSheet_1.pdf [file DataSheet_1.pdf]

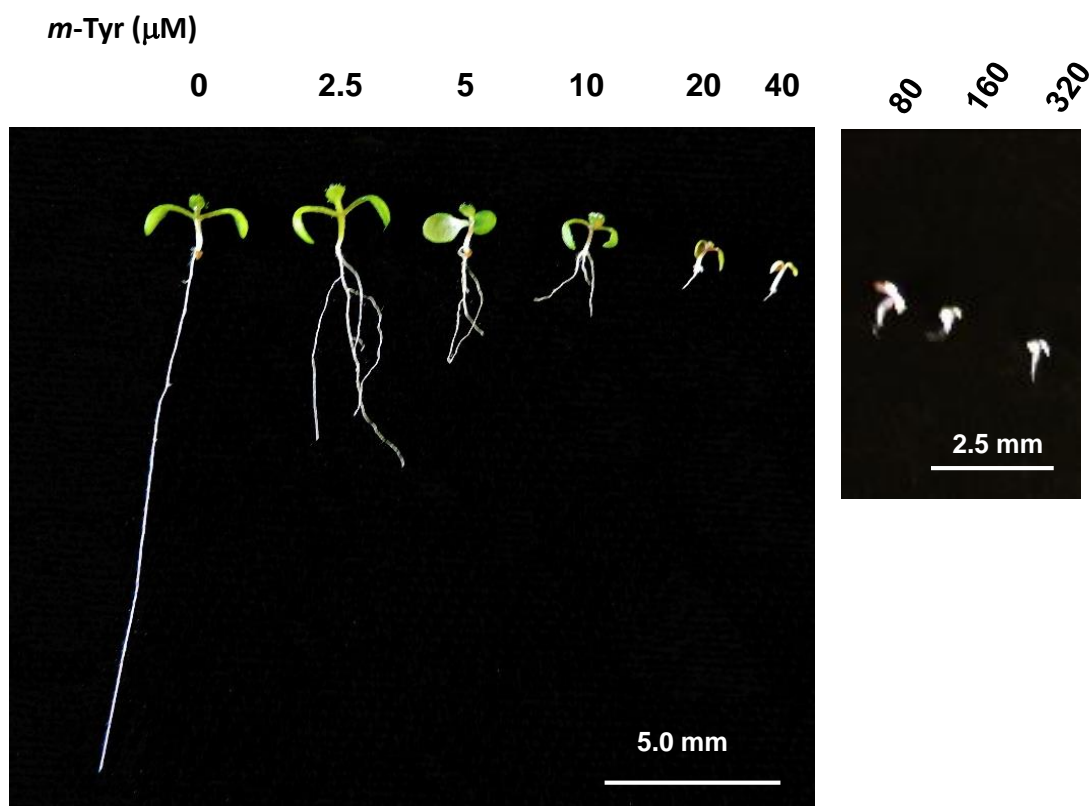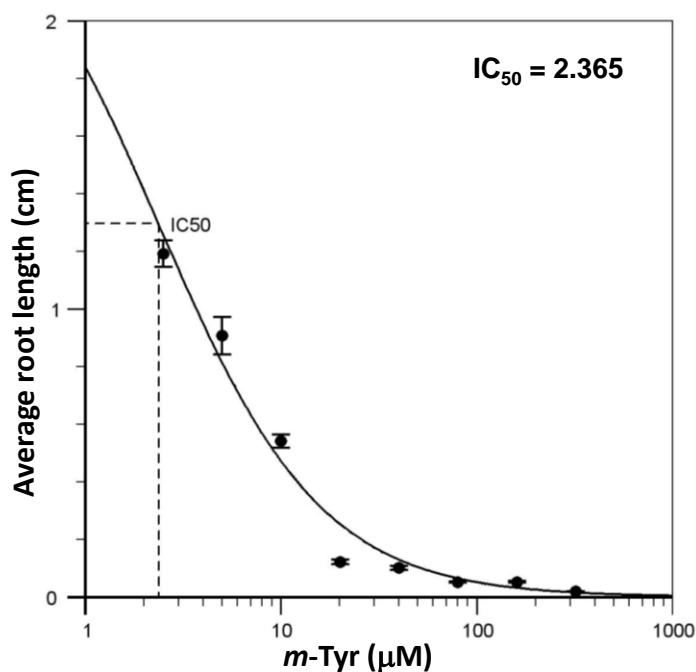

**Supplemental Figure S1. Effects of *m*-tyrosine on early seedling development of *Arabidopsis thaliana* (Col-0) plants.**

*Arabidopsis thaliana* seeds were sown in MS-agar plates in absence or presence of different concentrations *m*-tyrosine (*m tyr*) as indicated. The figure shows 5 days old seedlings.  $\text{IC}_{50}$  (i.e., concentrations required to achieve 50% reduction of *Arabidopsis* root growth) was calculated from the relative root lengths of 5-day-old *Arabidopsis* seedlings grown at different *m*-tyrosine concentrations, using the 'Quest-Graph™ IC50 calculator' (<https://www.aatbio.com/tools/ic50-calculator>). The values are means of four biological replicates with about 25 seedlings in each treatment. Error bars indicate one standard deviation.
