# Supplementary material for: The Phytotoxicity of Meta-Tyrosine Is Associated With Altered Phenylalanine Metabolism and Misincorporation of This Non-Proteinogenic Phe-Analog to the Plant's Proteome
Source: PubMed Central journal article supplement (PMC7069529; doi:10.3389/fpls.2020.00140), 2020-03-06
Supplement: DataSheet_2.pdf [file DataSheet_2.pdf]

**a**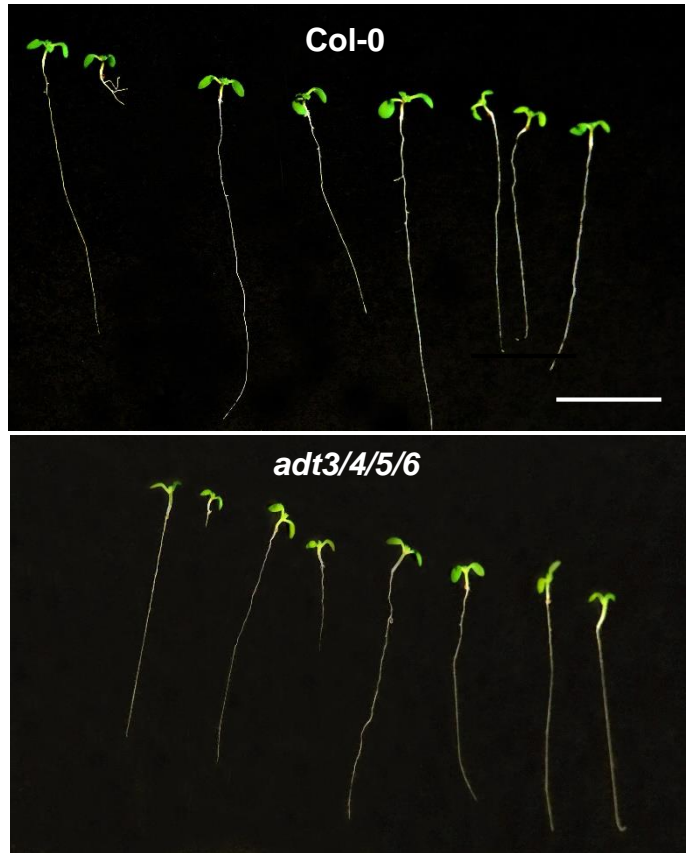

**Phe ( $\mu\text{M}$ )**            **0**            **20**            **40**            **80**  
**m-Tyr ( $10\ \mu\text{M}$ )**    -    +        -    +        -    +        -    +

**b**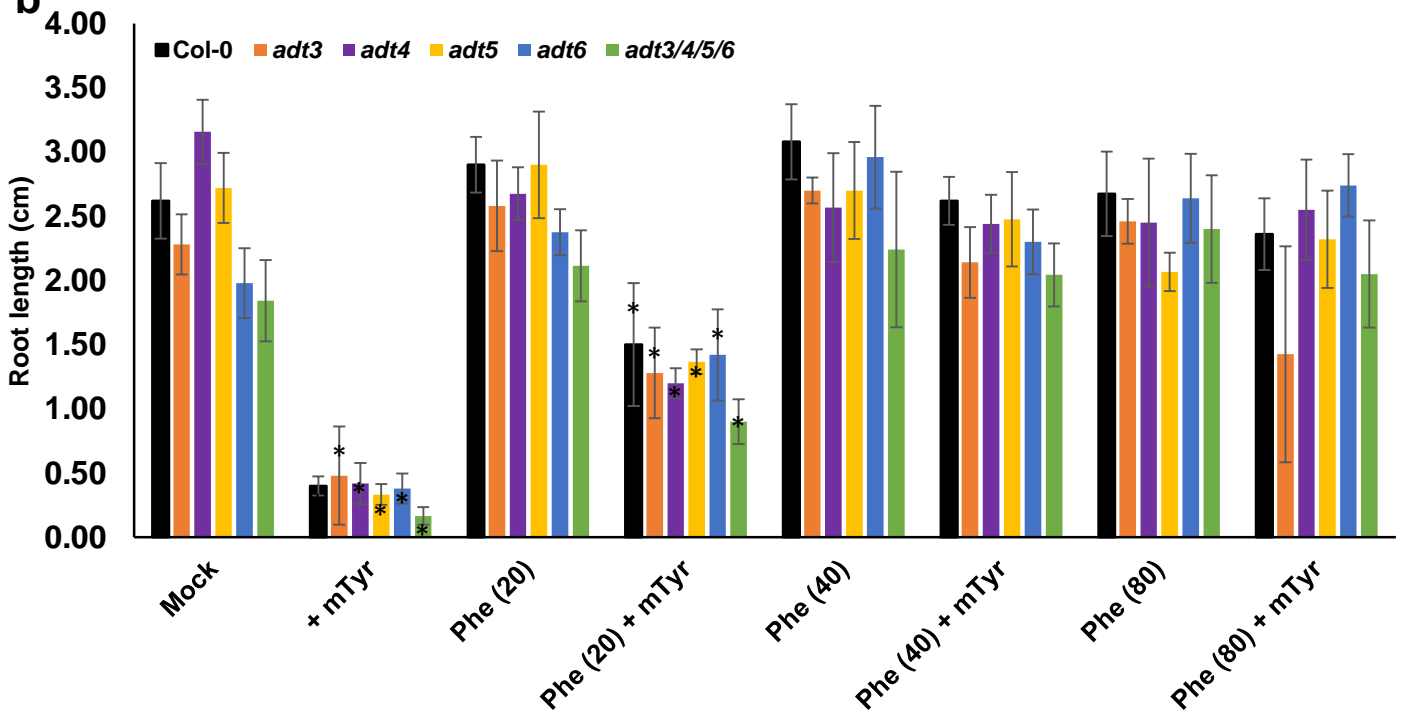

**Supplemental Figure S2. The effect of phenylalanine on root growth of *Arabidopsis thaliana* wild-type (Col-0) and *adt3456* mutants grown in the absence or presence of *m*-tyrosine.**  
 (A) 5-day-old *Arabidopsis* seeds (wild type and *adt3/4/5/6* mutant) were germinated in MS-agar plates in the absence (Mock) or presence of different Phe concentrations (20 -80  $\mu\text{M}$ ) and *m*-tyrosine (10  $\mu\text{M}$ ). (B) Measurements of the root lengths in 5-day-old *Arabidopsis* seedlings. Bar in panel A represents 1.0 cm. The values are means of three biological replicates with about 25 seedlings in each treatment. Error bars indicate one standard deviation. Asterisk in panel B indicates a significant difference from control (Student's T-test,  $P \leq 0.05$ ).
