# Supplementary material for: The Phytotoxicity of Meta-Tyrosine Is Associated With Altered Phenylalanine Metabolism and Misincorporation of This Non-Proteinogenic Phe-Analog to the Plant's Proteome
Source: PubMed Central journal article supplement (PMC7069529; doi:10.3389/fpls.2020.00140), 2020-03-06
Supplement: DataSheet_3.pdf [file DataSheet_3.pdf]

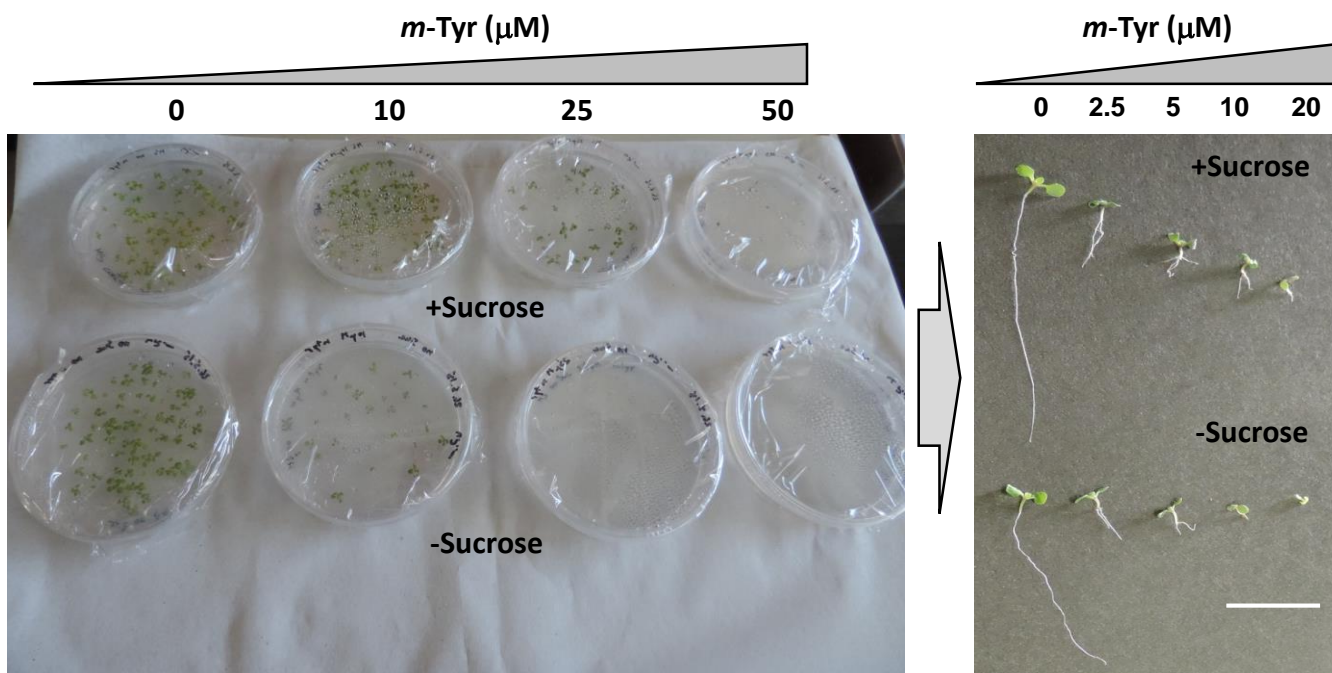

**Supplemental Figure S3. The effects of *m*-tyrosine and sucrose on leaf coloring and seedling growth.** 5-day-old *Arabidopsis* seedlings grown on MS plates containing different concentrations of *m*-tyrosine (*m*-Tyr) in the presence or absence of sucrose (1% w/v). Bar represents 1 cm.
