# Supplementary material for: The Phytotoxicity of Meta-Tyrosine Is Associated With Altered Phenylalanine Metabolism and Misincorporation of This Non-Proteinogenic Phe-Analog to the Plant's Proteome
Source: PubMed Central journal article supplement (PMC7069529; doi:10.3389/fpls.2020.00140), 2020-03-06
Supplement: DataSheet_5.pdf [file DataSheet_5.pdf]

**a***m*-Tyr ( $\mu$ M) 0 1.25 2.5 5 10 20 40

Col-0

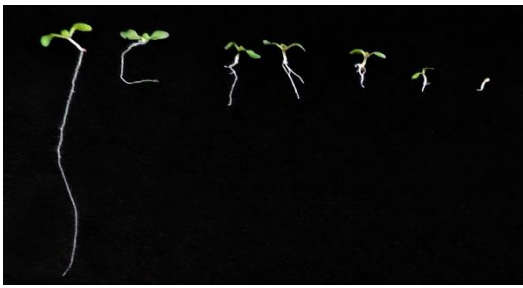*atg5*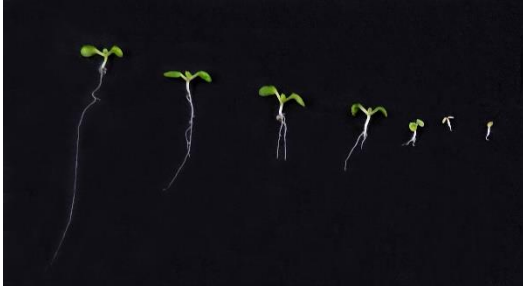*atg7*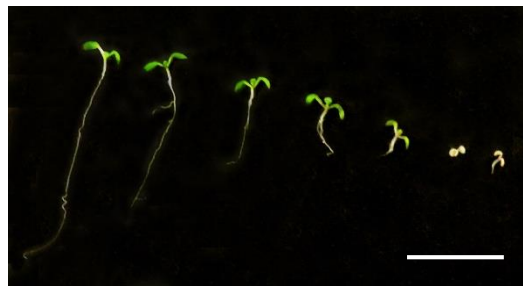**b**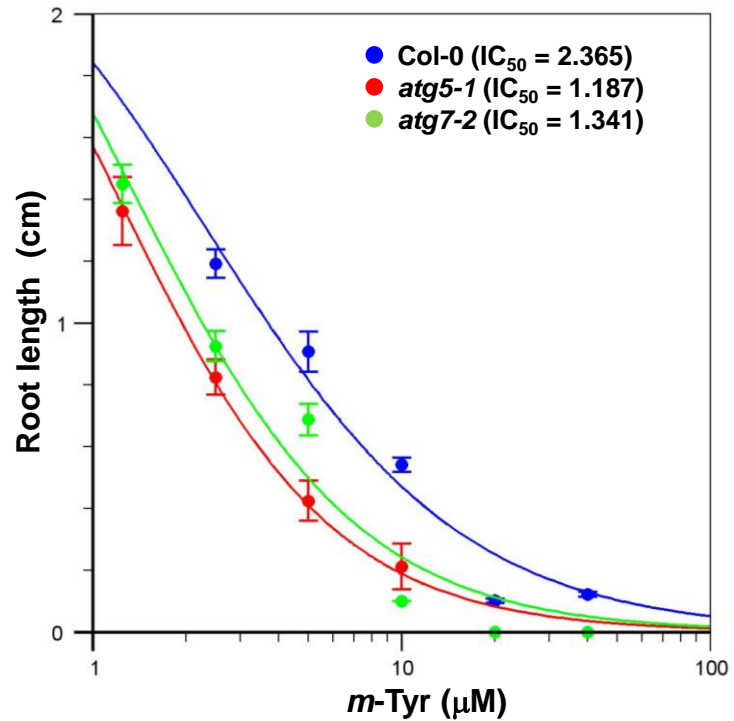

**Supplemental Figure S5. The effect of *m*-tyrosine on root growth of *Arabidopsis thaliana* wild-type and *atg* mutants.**

(A) 5-day-old *Arabidopsis* seeds of wild-type (Col-0), *atg5* and *atg7* mutant-lines, were germinated in MS-agar plates in the absence ('0') or presence of *m*-tyrosine (1.25 to 40  $\mu$ M). Bar in panel A represents 1.0 cm. (B) Measurements of the root lengths in 5-day-old *Arabidopsis* seedlings.  $IC_{50}$  (i.e., concentrations required to achieve 50% reduction of *Arabidopsis* root growth) was calculated from the relative root lengths of 5-day-old *Arabidopsis* seedlings grown at different *m*-tyrosine concentrations, using the 'Quest-Graph™ IC50 calculator' (<https://www.aatbio.com/tools/ic50-calculator>). The values are means of four biological replicates with about 25 seedlings in each treatment. Error bars indicate one standard deviation. Asterisk in panel B indicates a significant difference from control (Student's T-test,  $P \leq 0.05$ ).
