# Supplementary material for: The Phytotoxicity of Meta-Tyrosine Is Associated With Altered Phenylalanine Metabolism and Misincorporation of This Non-Proteinogenic Phe-Analog to the Plant's Proteome
Source: PubMed Central journal article supplement (PMC7069529; doi:10.3389/fpls.2020.00140), 2020-03-06
Supplement: Table_1.pdf [file Table_1.pdf]

**Supplemental Table S1.** Antibodies used for the analysis of *m*-tyrosine effects on Arabidopsis.

| Antibody | Protein I.D.                                   | origin                           | serum               | dilution   | Reference / source                                          |
|----------|------------------------------------------------|----------------------------------|---------------------|------------|-------------------------------------------------------------|
| AOX1/2   | Alternative oxidase subunits1/2                | <i>Typhonium venosum</i>         | Mouse (monoclonal)  | 1 : 5,00   | (Elthon <i>et al.</i> 1989)                                 |
| AtpA     | Mitochondrial ATP-synthase subunit $\alpha$    | <i>Zea mays</i>                  | Mouse (monoclonal)  | 1 : 5,000  | (Michael <i>et al.</i> 1993)                                |
| CA2      | $\gamma$ -carbonic anhydrase-like subunit 2    | <i>Arabidopsis thaliana</i>      | Rabbit (polyclonal) | 1 : 1,000  | (Perales <i>et al.</i> 2005, Sunderhaus <i>et al.</i> 2006) |
| COX2     | Cytochrome oxidase subunit-2                   | <i>Arabidopsis thaliana</i>      | Rabbit (polyclonal) | 1 : 5,000  | Agrisera antibodies, AS04 053A                              |
| NAD9     | NADH-dehydrogenase complex subunit-9           | <i>Triticum spp.</i>             | Rabbit (polyclonal) | 1 : 50,000 | (Lamattina <i>et al.</i> 1993)                              |
| NDB2     | external NADH-dehydrogenase subunit 2          | <i>Arabidopsis thaliana</i>      | Rabbit (polyclonal) | 1 : 2,000  | (Carrie <i>et al.</i> 2008)                                 |
| RISP     | Rieske iron-sulfur protein                     | <i>Arabidopsis thaliana</i>      | Rabbit (polyclonal) | 1 : 5,000  | Gift of Prof. Ian Small, UWA                                |
| VDAC     | Voltage-dependent anion channel                | <i>Zea mays</i>                  | Mouse (monoclonal)  | 1 : 5,000  | Thomas Elthon collection, PM035                             |
| PsaA     | Photosystem I P700 chlorophyll a apoprotein A1 | <i>Chlamydomonas reinhardtii</i> | Rabbit (polyclonal) | 1 : 1,000  | Agrisera (AS06 172)                                         |
| PsbA     | Photosystem II D1 protein                      | synthetic peptide                | Rabbit (polyclonal) | 1 : 500    | Agrisera (AS05 084)                                         |
| PsbC     | Photosystem II CP43 reaction center protein    | <i>Arabidopsis thaliana</i>      | Rabbit (polyclonal) | 1 : 1,000  | Gift of Prof. Nir Keren (HUJI)                              |
| PsbD     | Photosystem II D2 protein                      | <i>Arabidopsis thaliana</i>      | Rabbit (polyclonal) | 1 : 1,000  | Gift of Prof. Nir Keren (HUJI)                              |

## References

- Carrie, C., Murcha, M.W., Kuehn, K., Duncan, O., Barthet, M., Smith, P.M., Eubel, H., Meyer, E., Day, D.A., Millar, A.H. and Whelan, J. (2008) Type II NAD(P)H dehydrogenases are targeted to mitochondria and chloroplasts or peroxisomes in *Arabidopsis thaliana*. *FEBS Lett*, **582**, 3073-3079.
- Elthon, T.E., Nickels, R.L. and McIntosh, L. (1989) Monoclonal antibodies to the alternative oxidase of higher plant mitochondria. *Plant Physiol*, **89**, 1311-1317.
- Lamattina, L., Gonzalez, D., Gualberto, J. and Grienenberger, J.-M. (1993) Higher plant mitochondria encode an homologue of the nuclear-encoded 30-kDa subunit of bovine mitochondrial complex I. *Eur J Biochem*, **217**, 831-838.
- Michael, H.L., Arnost, H. and Elthon, T.E. (1993) Monoclonal Antibodies to the a- and b-Subunits of the Plant Mitochondrial F<sub>1</sub>-ATPase. *Plant Physiology*, **101**, 931-937.
- Perales, M., Eubel, H., Heinemeyer, J., Colaneri, A., Zabaleta, E. and Braun, H.-P. (2005) Disruption of a nuclear gene encoding a mitochondrial gamma carbonic anhydrase reduces complex I and supercomplex I+III2 levels and alters mitochondrial physiology in *Arabidopsis*. *J Mol Biol*, **350**, 263-277.
- Sunderhaus, S., Dudkina, N.V., Jansch, L., Klodmann, J., Heinemeyer, J., Perales, M., Zabaleta, E., Boekema, E.J. and Braun, H.P. (2006) Carbonic anhydrase subunits form a matrix-exposed domain attached to the membrane arm of mitochondrial complex I in plants. *J Biol Chem*, **281**, 6482-6488.
