# Supplementary material for: The Phytotoxicity of Meta-Tyrosine Is Associated With Altered Phenylalanine Metabolism and Misincorporation of This Non-Proteinogenic Phe-Analog to the Plant's Proteome
Source: PubMed Central journal article supplement (PMC7069529; doi:10.3389/fpls.2020.00140), 2020-03-06
Supplement: Table_2.pdf [file Table_2.pdf]

**Supplemental Table S2.** Profiling of native amino acids in 5-day-old *Arabidopsis thaliana* seedlings grown in the absence (untreated) or presence of 10  $\mu$ M *m*-tyrosine (*m*-Tyr).

|    | <b>Amino acid</b> | <b>control</b>  | <b>+ <i>m</i>-Tyr</b>             |
|----|-------------------|-----------------|-----------------------------------|
| 1  | Alanine           | 1.00 $\pm$ 0.12 | 0.82 $\pm$ 0.13                   |
| 2  | Arginine          | 1.00 $\pm$ 0.15 | 0.78 $\pm$ 0.16                   |
| 3  | Asparagine        | 1.00 $\pm$ 0.17 | 0.79 $\pm$ 0.18                   |
| 4  | Aspartate         | 1.00 $\pm$ 0.09 | 0.74 $\pm$ 0.16                   |
| 5  | Cysteine          | 1.00 $\pm$ 0.14 | 0.92 $\pm$ 0.24                   |
| 6  | Glutamate         | 1.00 $\pm$ 0.13 | 1.01 $\pm$ 0.14                   |
| 7  | Glutamine         | 1.00 $\pm$ 0.16 | 1.03 $\pm$ 0.29                   |
| 8  | Glycine           | 1.00 $\pm$ 0.07 | 0.78 $\pm$ 0.08                   |
| 9  | Histidine         | 1.00 $\pm$ 0.19 | 0.79 $\pm$ 0.21                   |
| 10 | Isoleucine        | 1.00 $\pm$ 0.06 | 0.85 $\pm$ 0.16                   |
| 11 | Leucine           | 1.00 $\pm$ 0.07 | 0.79 $\pm$ 0.22                   |
| 12 | Lysine            | 1.00 $\pm$ 0.11 | 0.79 $\pm$ 0.23                   |
| 13 | Methionine        | 1.00 $\pm$ 0.10 | 0.75 $\pm$ 0.16                   |
| 14 | Phenylalanine     | 1.00 $\pm$ 0.11 | <b>0.57 <math>\pm</math> 0.06</b> |
| 15 | Proline           | 1.00 $\pm$ 0.13 | 1.11 $\pm$ 0.18                   |
| 16 | Serine            | 1.00 $\pm$ 0.17 | 0.77 $\pm$ 0.21                   |
| 17 | Threonine         | 1.00 $\pm$ 0.07 | 0.79 $\pm$ 0.21                   |
| 18 | Tryptophan        | 1.00 $\pm$ 0.09 | 0.86 $\pm$ 0.23                   |
| 19 | Tyrosine          | 1.00 $\pm$ 0.22 | 0.64 $\pm$ 0.12                   |
| 20 | Valine            | 1.00 $\pm$ 0.10 | 0.94 $\pm$ 0.15                   |

5-day-old seedlings grown in the absence or presence of 10  $\mu$ M exogenous *m*-tyrosine (*m*-Tyr) were analyzed by GC-qTOF-MS. Data is presented as averages of 4 replicates normalized to control plants (i.e., untreated plants germinated in MS-media), grown under the same growth conditions. The data shows the relative peak area of each amino acid in untreated versus *m*-tyrosine-treated seedlings. The values are means of four biological replicates  $\pm$  SE. Significant differences following student's t-test ( $P \leq 0.05$ ), compared to the control, are represented in bold.
