# Supplementary material for: The Phytotoxicity of Meta-Tyrosine Is Associated With Altered Phenylalanine Metabolism and Misincorporation of This Non-Proteinogenic Phe-Analog to the Plant's Proteome
Source: PubMed Central journal article supplement (PMC7069529; doi:10.3389/fpls.2020.00140), 2020-03-06
Supplement: Table_3.pdf [file Table_3.pdf]

**Experiment title:**  
**Organism/Plant species:**  
**Organ/tissue:**  
**Analytical tool:**

Free Amino Acids measurements of m-Tyr treated Arabidopsis seedlings  
 Arabidopsis thaliana seedlings  
 5-day-old whole seedlings  
 GC-qTOF-MS

Peak/compound #- number of compound found  
 RT - retention time  
 Putative Name- putative identification of the metabolite/derivative  
 Corresponding metabolite name in literature  
 Mol. Formula- molecular formula of the metabolite  
 Mass to charge ratio (m/z)  
 Standard - Standard compound used for identification (Sigma catalog number)

| Peak/compound # | Putative name         | Metabolite name | Molecular formula                                             | m/z      | RT(min) | Metabolite class |
|-----------------|-----------------------|-----------------|---------------------------------------------------------------|----------|---------|------------------|
| 1               | L-Alanine, 2TMS       | Alanine         | C <sub>3</sub> H <sub>7</sub> NO <sub>2</sub>                 | 116.0892 | 4.667   | Amino acid       |
| 2               | Alanine (3TMS)        | Alanine         | C <sub>3</sub> H <sub>7</sub> NO <sub>2</sub>                 | 188.126  | 7.233   | Amino acid       |
| 3               | Arginine, 3TMS        | Arginine        | C <sub>6</sub> H <sub>14</sub> N <sub>4</sub> O <sub>2</sub>  | 157.124  | 11.302  | Amino acid       |
| 4               | Asparagine (4TMS)     | Asparagine      | C <sub>4</sub> H <sub>8</sub> N <sub>2</sub> O <sub>3</sub>   | 216.1254 | 9.054   | Amino acid       |
| 5               | Asparagine, 3TMS      | Asparagine      | C <sub>4</sub> H <sub>8</sub> N <sub>2</sub> O <sub>3</sub>   | 116.0915 | 10.458  | Amino acid       |
| 6               | L-Aspartic acid, 2TMS | Aspartic Acid   | C <sub>4</sub> H <sub>7</sub> NO <sub>4</sub>                 | 160.081  | 8.568   | Amino acid       |
| 7               | L-Aspartic acid, 3TMS | Aspartic Acid   | C <sub>4</sub> H <sub>7</sub> NO <sub>4</sub>                 | 232.1168 | 8.907   | Amino acid       |
| 8               | Cysteine, 3TMS        | Cysteine        | C <sub>3</sub> H <sub>7</sub> NO <sub>2</sub> S               | 100.065  | 6.985   | Amino acid       |
| 9               | L-Glutamic acid, 3TMS | Glutamic acid   | C <sub>5</sub> H <sub>9</sub> NO <sub>5</sub>                 | 246.1336 | 9.738   | Amino acid       |
| 10              | L-Glutamine, 3TMS     | Glutamine       | C <sub>5</sub> H <sub>10</sub> N <sub>2</sub> O <sub>3</sub>  | 156.0778 | 11.256  | Amino acid       |
| 11              | Glycine, 3TMS         | Glycine         | C <sub>2</sub> H <sub>5</sub> NO <sub>2</sub>                 | 174.1269 | 6.735   | Amino acid       |
| 12              | L-Histidine, 3TMS     | Histidine       | C <sub>6</sub> H <sub>9</sub> N <sub>3</sub> O <sub>2</sub>   | 154.525  | 14.723  | Amino acid       |
| 13              | L-Isoleucine TMS      | Isoleucine      | C <sub>6</sub> H <sub>13</sub> NO <sub>2</sub>                | 188.1089 | 6.058   | Amino acid       |
| 14              | L-Isoleucine, 2TMS s  | Isoleucine      | C <sub>6</sub> H <sub>13</sub> NO <sub>2</sub>                | 158.1399 | 6.615   | Amino acid       |
| 15              | L-Leucine, TMS        | Leucine         | C <sub>6</sub> H <sub>13</sub> NO <sub>2</sub>                | 86.0959  | 5.772   | Amino acid       |
| 16              | Lysine (4TMS)         | Lysine          | C <sub>6</sub> H <sub>14</sub> N <sub>2</sub> O <sub>2</sub>  | 317.2294 | 11.551  | Amino acid       |
| 17              | L-Methionine, 2TMS    | Methionine      | C <sub>5</sub> H <sub>11</sub> NO <sub>2</sub> S              | 176.0909 | 9.241   | Amino acid       |
| 18              | Phenylalanine, 2TMS   | Phenylalanine   | C <sub>9</sub> H <sub>9</sub> NO <sub>2</sub>                 | 218.1079 | 10.197  | Amino acid       |
| 19              | Proline (1TMS)        | Proline         | C <sub>5</sub> H <sub>9</sub> NO <sub>2</sub>                 | 70.0671  | 6.309   | Amino acid       |
| 20              | L-Proline, 2TMS       | Proline         | C <sub>5</sub> H <sub>9</sub> NO <sub>2</sub>                 | 142.1065 | 6.949   | Amino acid       |
| 21              | L-Serine              | Serine          | C <sub>3</sub> H <sub>7</sub> NO <sub>3</sub>                 | 116.052  | 6.751   | Amino acid       |
| 22              | Serine, 3TMS          | Serine          | C <sub>3</sub> H <sub>7</sub> NO <sub>3</sub>                 | 204.1271 | 7.236   | Amino acid       |
| 23              | L-Threonine, 2TMS     | Threonine       | C <sub>4</sub> H <sub>9</sub> NO <sub>3</sub>                 | 130.069  | 7.015   | Amino acid       |
| 24              | L-Threonine, 3TMS     | Threonine       | C <sub>4</sub> H <sub>9</sub> NO <sub>3</sub>                 | 218.1351 | 7.405   | Amino acid       |
| 25              | L-Tryptophan, 3TMS    | Tryptophane     | C <sub>11</sub> H <sub>12</sub> N <sub>2</sub> O <sub>2</sub> | 202.1016 | 14.523  | Amino acid       |
| 26              | L-Tyrosine, 3TMS      | Tyrosine        | C <sub>9</sub> H <sub>9</sub> NO <sub>3</sub>                 | 280.1575 | 12.283  | Amino acid       |
| 27              | L-Valine, TMS         | Valine          | C <sub>5</sub> H <sub>11</sub> NO <sub>2</sub>                | 72.0825  | 5.059   | Amino acid       |
| 28              | L-Valine, 2TMS        | Valine          | C <sub>5</sub> H <sub>11</sub> NO <sub>2</sub>                | 144.1201 | 5.814   | Amino acid       |
| 29              | Ribitol               | Ribitol         | C <sub>5</sub> H <sub>12</sub> O <sub>5</sub>                 | 319.1626 | 9.606   | Sugar alcohol    |
